# Supplementary material for: Clinical Characteristics, Treatment Outcomes, And Genetic Alterations of Radiation-Induced Gliomas
Source: Research Square preprint supplement (doi:10.21203/rs.3.rs-1057891/v1), 2021-11-15
Supplement: Supplementary file 1 [file 1c454660c8076a9a60eb25fc.xlsx]

## Sheet: Table 1
	Table 1: Patient characteristics of primary diseases
	Case no.	Sex	Age at primary disease (yrs)	Primary Disease		Therapy		Chemotherapy	Latency (years)
					Location	Radiation therapy	Radiation dose (Gy)
	1	M	15	Germinoma	Suprasellar	Local, Local	41.5, 60	Yes	30
	2	M	25	Pituitary adenoma	Sellar	Local	60	No	20
	3	M	1	Acute lymphoblastic lymphoma	Systemic	TBI	18	Yes	9
	4	M	20	Germinoma	Suprasellar	WB	50	Yes	13
	5	F	12	Pilocytic astrocytoma	Hypothalamus	Local	54	No	22
	6	F	9	Medulloblastoma	Cerebellum	CSI	WB: 35.6, WS: 31.9	Yes	30
	7	F	10	Medulloblastoma	Cerebellum	CSI	WB: 40, WS: 30	Yes	13
	8	M	2	Acute lymphoblastic lymphoma	Systemic	TBI	12	Yes	15
	9	F	15	Diffuse astrocytoma, IDH2-mutant	Left Frontal	Local	60	Yes	17
	10	F	39	Metastatic brain tumor from Lung cancer	Multiple	CK, WB	CK: 22, WB: 30	Yes (TKI)	10
	11	M	4	Medulloblastoma	Cerebellum	CSI	WB: 55.8, WS: 23.4	Yes	24
	M: Male, F: Female, TBI: Total body irradiation, CSI: Craniospinal irradiation, WB: Whole brain, WS: Whole spine, CK: Cyberknife, TKI: Tyrosine kinase inhibitor

## Sheet: Table 2
	Table 2: Patient characteristics of radiation-induced gliomas
	Case no.	Sex	Age (yrs)	Secondary disease	Initial treatment			Treatment at first recurrence			PFS (months)	OS (months)	Status
					Operation	Chemotherapy	Radiation therapy	Operation	Chemotherapy	Radiation therapy
	1	M	45	GBM, NOS	Partial removal	ACNU	No	BSC			28.1	34.5	Dead
	2	M	45	AA, NOS	Partial removal	TMZ	No	BSC			3	8.4	Dead
	3	M	10	GBM, IDH-Wildtype	Biopsy	ACNU	Local RT 40Gy/20fr	No	CARE	No	3.8	11	Dead
	4	M	33	GBM, IDH-Wildtype	Biopsy	Carboplatin, Etoposide	No	BSC			2.5	4.6	Dead
	5	F	34	GBM, IDH-Wildtype	Total removal	TMZ	No	Subtotal removal	TMZ	Local RT 45Gy/25f	11.3	27.5	Dead
	6	F	39	AA, IDH-Wildtype	Rt. Parietal: partial removal Rt. Occipital: partial removal	TMZ	No	Rt. Parietal: Total removal Rt. Occipital: Total removal	TMZ	Local RT 60Gy/30fr	8.8	27.3	Dead
	7	F	23	GBM, IDH-Wildtype	Subtotal removal	TMZ	No	No	TMZ	SRT 40Gy/10fr	7.4	29.1	Dead
	8	M	17	GBM, NOS	Total removal	TMZ	Local RT 66Gy/33fr	No	No	GKS	17	30.8	Dead
	9	F	32	GBM, IDH-wildtype	Biopsy	TMZ	Local RT 60Gy/30fr	No	TMZ	SRT 42Gy/7fr	23	35.1	Dead
	10	F	49	GBM, IDH-wildtype	Total removal	TMZ, Bev	Local RT 50Gy/25fr	Biopsy	Bev	SRT 42Gy/7fr	15.9	28.3	Dead
	11	M	28	GBM, IDH-wildtype	Biopsy	TMZ, Bev	Local RT 40Gy/15fr	NA	NA	NA	6.1	6.1	Alive
	M: Male, F: Female, GBM: Glioblastoma, NOS: Not otherwise specified, AA: Anaplastic astrocytoma, IDH: Isocitrate dehydrogenase, Rt: Right, Lt: Left, ACNU: Nimustine hydrochloride, TMZ: Temozolomide, Bev: Bevacizumab, RT: Radiation therapy, BSC: Best supportive care, GKS: Gamma knife radiosurgery, SRT: Stereotactic radiotherapy, NA: Not available

## Sheet: Table 3
	Table 3: Summary of genetic alterations of 8 radiation-induced gliomas
	Case no.	Secondary disease	IDH1/2	BRAF	H3F3A	TERT	MGMT
	3	GBM, IDH-Wildtype	WT	NA	NA	WT	Hypo
	4	GBM, IDH-Wildtype	WT	WT	WT	WT	Hypo
	5	GBM, IDH-Wildtype	WT	WT	WT	WT	Hypo
	6	AA, IDH-Wildtype	WT	WT	WT	WT	Hyper
	7	GBM, IDH-Wildtype	WT	WT	WT	WT	Hypo
	9	GBM, IDH-Wildtype	WT	ND	ND	WT	Hypo
	10	GBM, IDH-Wildtype	WT	WT	WT	WT	Hypo
	11	GBM, IDH-Wildtype	WT	WT	WT	WT	Hyper
	GBM: Glioblastoma, AA: Anaplastic astrocytoma, WT: Wildtype, NA: Not available, ND: Not determined
